# Supplementary material for: TfR mAb-Cross-Linked Rituximab/MTX-PEG-PLL-PLGA Drug-Loaded Nanoparticles Enhance Anticancer Action in B Lymphocytes
Source: Hindawi journal article supplement (doi:10.1155/2019/7265450), 2019-09-12
Supplement: f1 [file 7265450.f1.pdf]

## GRAPHICAL ABSTRACT

Title: TfR mAb-cross-linked Rituximab/MTX-PEG-PLL-PLGA drug-loaded nanoparticles enhance anti-cancer action in B lymphocytes

Authors: Ran Liu, Gang Zhao, Shujun Wang, Yan Gu, Qi Han, Baoan Chen

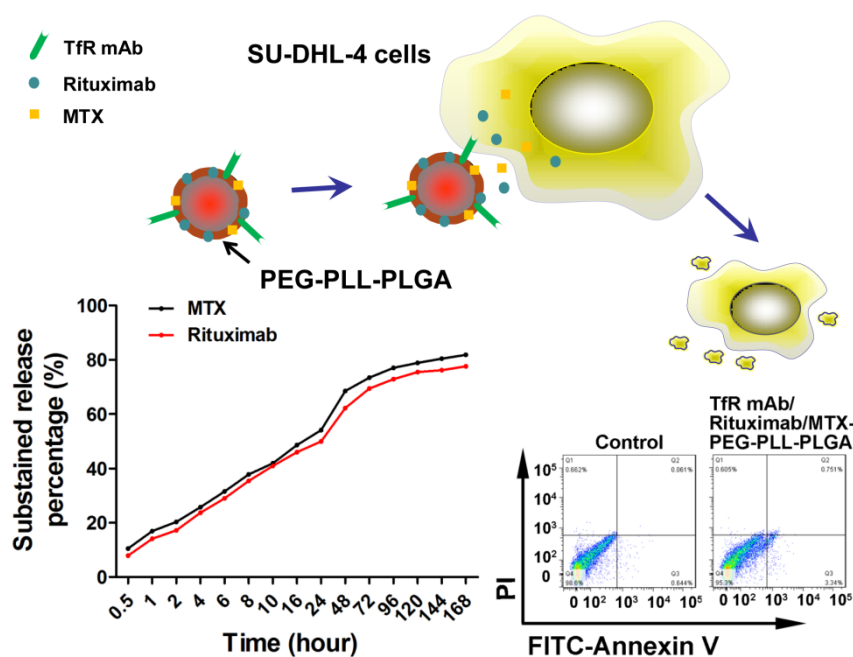

A precise and efficient carrier for the Rituximab and Methotrexate (MTX) was designed as nanomedicine for anti-cancer action in B lymphocytes. After the synthesis of Rituximab/MTX-PEG-PLL-PLGA, the TfR mAb was subsequently cross-linked to the nanoparticles. The nanoparticle-loaded system can precisely and efficiently transport the Rituximab and MTX drug with long-term sustained release of into SU-DHL-4 cells. The TfR mAb/Rituximab/MTX-PEG-PLL-PLGA nanoparticle increased the cell apoptosis in the SU-DHL-4 cells, resulting in a notable cytotoxicity in B lymphocytes.
